# Supplementary material
Source: PubMed Central journal article supplement (PMC6056247)
Supplement: NIHMS981698-supplement-1.pdf [file NIHMS981698-supplement-1.pdf]

**Cell Reports, Volume 24**

**Supplemental Information**

**Uncoupling Hepatic Oxidative Phosphorylation**

**Reduces Tumor Growth in Two Murine**

**Models of Colon Cancer**

**Yongliang Wang, Ali R. Nasiri, William E. Damsky, Curtis J. Perry, Xian-Man Zhang, Aviva Rabin-Court, Michael N. Pollak, Gerald I. Shulman, and Rachel J. Perry**

# Figure S1

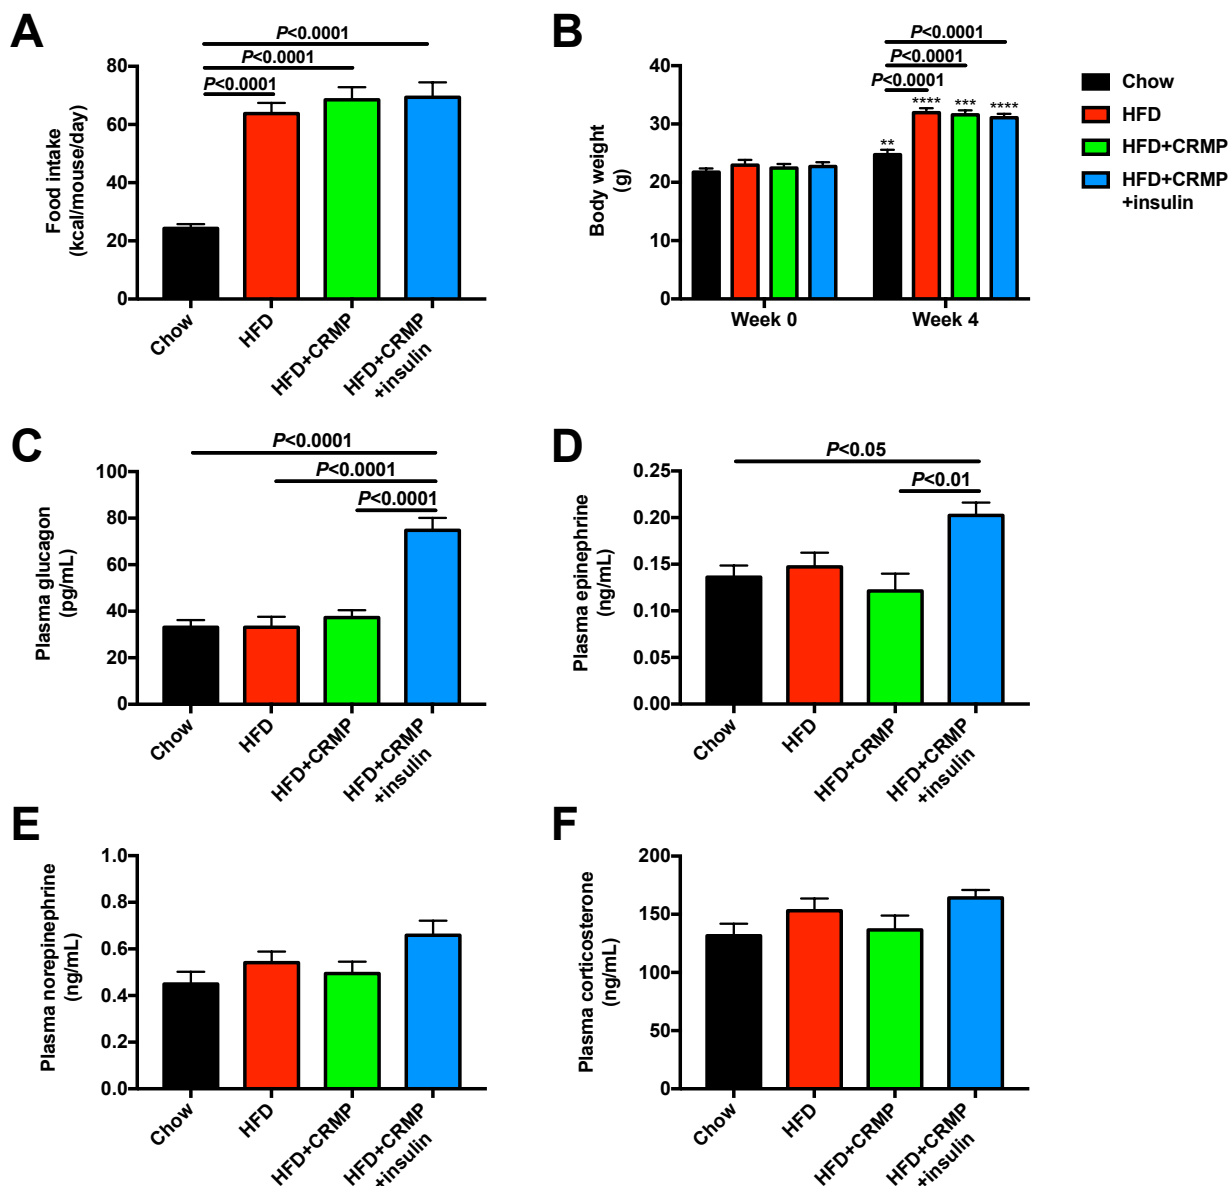

**Figure S1, related to Figure 1.** Controlled release mitochondrial protonophore slows tumor growth and limits tumor glucose uptake and oxidation due to reversal of hyperinsulinemia, independent of body weight. (A) Daily food intake during week 3 of treatment. (B) Body weight ( $n=7-8$  per group).  $**P<0.01$ ,  $***P<0.001$ ,  $****P<0.0001$  by the 2-tailed paired Student's t-test as compared to the same mice at week 0. (C)-(F) Plasma glucagon, epinephrine, norepinephrine, and corticosterone concentrations. In all panels, unless otherwise specified, data are the mean  $\pm$  S.E.M. and groups were compared by ANOVA with Bonferroni's multiple comparisons test.

## Figure S2

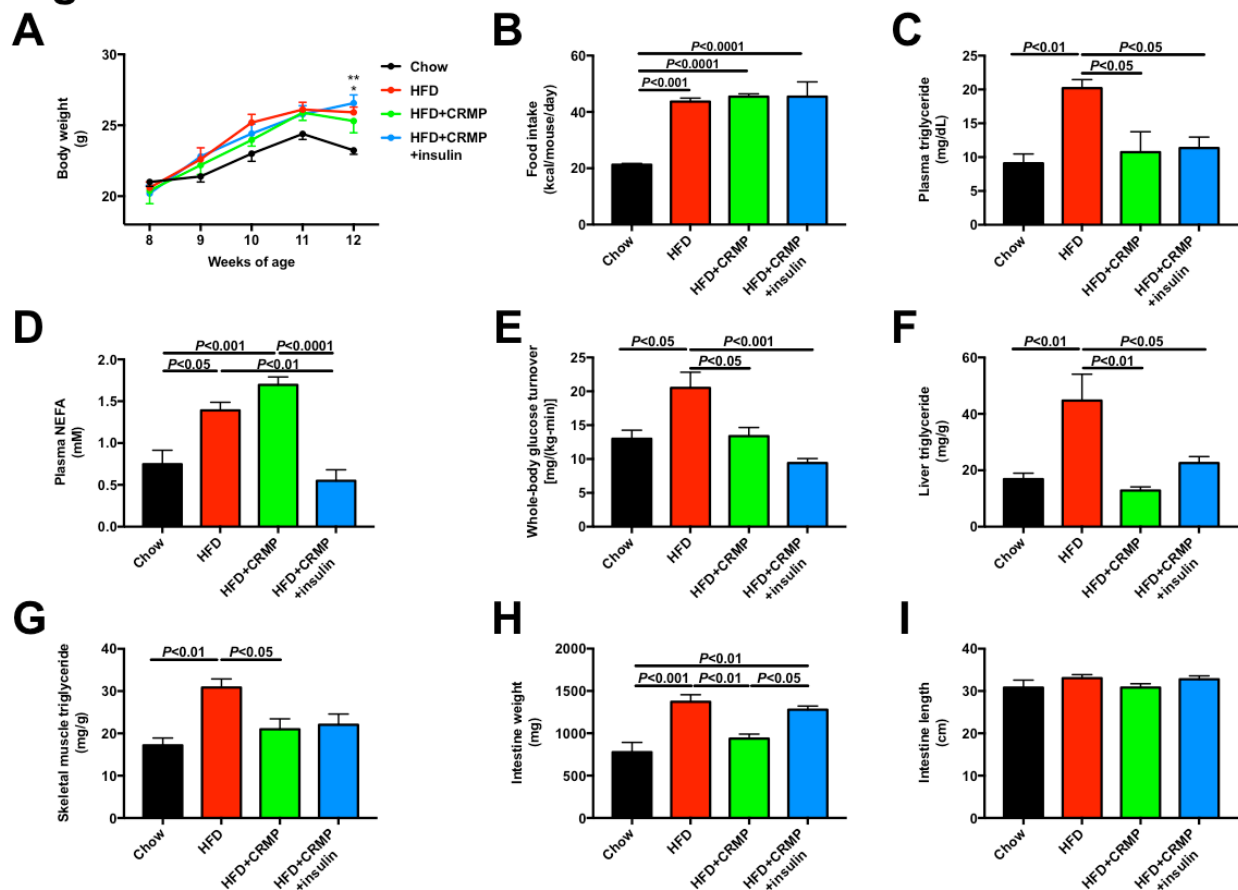

**Figure S2, related to Figure 3.** CRMP slows tumor growth in high fat fed  $Apc^{Min+/-}$  mice, a murine model of familial adenomatous polyposis, by reversing hyperinsulinemia. (A) Body weight. Treatments were begun at 8 weeks of age and continued for four weeks. \* $P < 0.05$  (chow vs. HFD), \*\* $P < 0.01$  (chow vs. HFD+CRMP+insulin). (B) Food intake measured during the third week of treatment. (C)-(D) Plasma triglyceride and NEFA concentrations. (E) Whole-body glucose turnover ( $n = 4-5$  per group). (F)-(G) Liver and skeletal muscle triglyceride content. (H)-(I) Length and weight of the small and large intestine. Unless otherwise specified, data are the mean  $\pm$  S.E.M. of  $n = 5$  per group, with comparisons by ANOVA with Bonferroni's multiple comparisons test.

# Figure S3

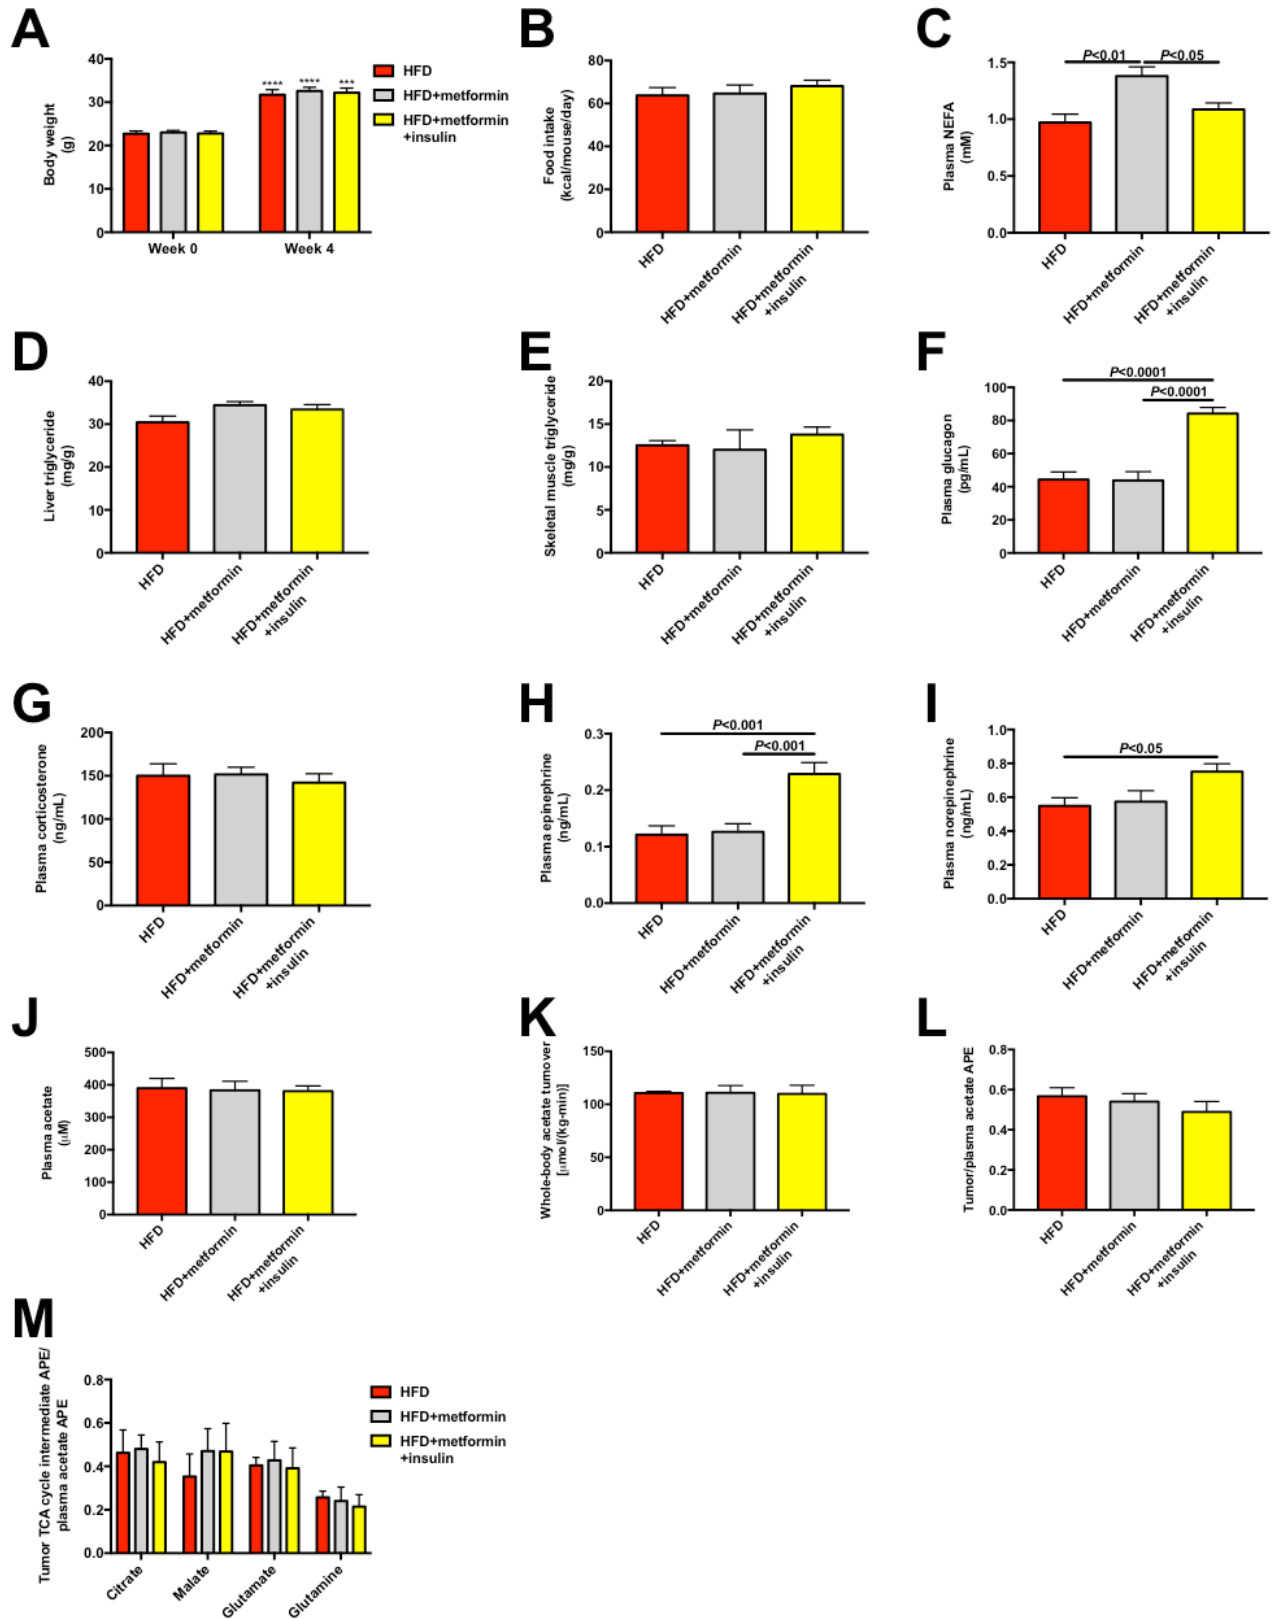

**Figure S3, related to Figure 4.** Metformin slows tumor growth and limits tumor glucose uptake and oxidation secondary to reversal of hyperinsulinemia in HFD mice. (A) Body weight. (B) Food intake in week 3 of treatment (n=6 per group). \*\*\* $P < 0.001$ , \*\*\*\* $P < 0.0001$  vs. week 0 by the 2-tailed paired Student's t-test. (C) Plasma NEFA concentrations. (D)-(E) Liver and quadriceps triglyceride content. (F)-(I) Plasma glucagon, corticosterone, epinephrine, and norepinephrine concentrations. (J)-(K) Plasma acetate concentrations and whole-body acetate turnover. (L) Ratio of tumor to plasma acetate enrichment in mice infused with [1-<sup>13</sup>C] acetate. (M) Ratio of tumor TCA cycle intermediate enrichment to plasma acetate enrichment in mice infused with [1-<sup>13</sup>C] acetate. Unless otherwise specified, data are the mean±S.E.M. of n=8 per group, with comparisons between groups by ANOVA with Bonferroni's multiple comparisons test.
